# Supplementary material for: Inhaler usability of a pressurized metered dose inhaler and a soft mist inhaler in patients with COPD: A simulated-use study
Source: PubMed Central journal article supplement — Chron Respir Dis. 2018 Jul 17;16:1479972318787914. doi: 10.1177/1479972318787914 (PMC6302969; doi:10.1177/1479972318787914), 2018-07-17
Supplement: RWE_Device_Handling_Study_MS_SUPPLEMENTARY_MATERIAL.pdf [file RWE_Device_Handling_Study_MS_SUPPLEMENTARY_MATERIAL.pdf]

## Supplementary material

### Acceptable task performance

SMI

| Task step                                                                  | Acceptable                                                                      | Unacceptable                                                                                                                                                                     |
|----------------------------------------------------------------------------|---------------------------------------------------------------------------------|----------------------------------------------------------------------------------------------------------------------------------------------------------------------------------|
| <b>Priming</b>                                                             | Attempted                                                                       | Ignored, skipped                                                                                                                                                                 |
| Do not rotate clear base until cartridge inserted                          | Ignored, skipped                                                                | Any rotation or attempt                                                                                                                                                          |
| Press safety catch                                                         | Pressed sufficient to release clear base<br>Pressed insufficient once           | Ignored, skipped<br>Pressed insufficient repeatedly                                                                                                                              |
| Pull off clear base                                                        | Clear base removed entirely                                                     | Ignored, skipped                                                                                                                                                                 |
| Do not touch piercing element                                              | Ignored, skipped                                                                | Any attempt                                                                                                                                                                      |
| Push narrow end of cartridge into base of inhaler                          | Narrow end pushed, seal broken                                                  | Wrong end pushed sufficient to break seal                                                                                                                                        |
| Place cartridge on hard surface to push firmly (until 1/8 inch is visible) | Pushed in, 1/8 inch visible                                                     | Ignored, skipped<br>Greater than 1/8 inch visible                                                                                                                                |
| Replace clear base                                                         | Replaced, catch engaged                                                         | Ignored, skipped<br>Replaced, catch not engaged                                                                                                                                  |
| Hold inhaler upright                                                       | Held $\leq 45^\circ$ of upright                                                 | Held $> 45^\circ$ of upright                                                                                                                                                     |
| Turn clear base in direction of arrows on label until it clicks (1/2 turn) | Rotated audible click<br>Wrong way single attempt                               | Ignored, skipped<br>Insufficient rotation, no click heard<br>Wrong way, repeated attempts<br>Rotated $> 1/2$ turn<br>Rotated $> 1$ click audible<br>Finger on button & activates |
| Open cap                                                                   | Cap open enough to clear plume                                                  | Already opened<br>Ignored, skipped<br>Opened but plume impinged                                                                                                                  |
| Point device down, away from face and others                               | Held $> 45^\circ$ of upright<br>Held in fume hood<br>Held away from face/others | Held $\leq 45^\circ$ of upright<br>At point of activation...<br>outside fume hood<br>pointed at face/others                                                                      |
| Press dose release button                                                  | Pressed sufficient to activate<br>Pressed insufficient once                     | Ignored, skipped<br>Pressed insufficient repeatedly                                                                                                                              |

|                                                                                       |                                                                                                                                                              |                                                                                                                                                                                          |
|---------------------------------------------------------------------------------------|--------------------------------------------------------------------------------------------------------------------------------------------------------------|------------------------------------------------------------------------------------------------------------------------------------------------------------------------------------------|
| Replace cap                                                                           | Cap audible click                                                                                                                                            | Ignored, skipped                                                                                                                                                                         |
| Repeat until spray is visible                                                         | Repeated, plume visible<br>Repeated after plume visible                                                                                                      | Ignored, skipped                                                                                                                                                                         |
| Repeat 3 more times                                                                   | Repeated 3 times <sup>a</sup><br>Repeated 3–6 times                                                                                                          | Ignored, skipped<br>Repeated 2–3 times<br>Repeated $\geq 6$ times                                                                                                                        |
| [If not used for 3 days, spray 1 puff toward ground]                                  | Observable recognition of 3 days<br>Sprayed $>45^\circ$ of upright<br>Sprayed in fume hood<br>Sprayed away from face/others                                  | Ignored, skipped<br>No recognition of 3 days<br>Confusion with 21 days<br>Sprayed $\leq 45^\circ$ of upright<br>Sprayed outside fume hood<br>Sprayed pointed at face/others              |
| [Reprime after 21 days of non-use] <sup>b</sup>                                       | Observable recognition of $\leq 21$ days<br>Confusion with 3 days<br>Sprayed $>45^\circ$ of upright<br>Sprayed in fume hood<br>Sprayed away from face/others | Ignored, skipped<br>No recognition of 21 days<br>Belief $>21$ days<br>Sprayed $\leq 45^\circ$ of upright<br>Sprayed outside fume hood<br>Sprayed pointed at face/others                  |
| <b>Use</b>                                                                            | Attempted                                                                                                                                                    | Ignored, skipped                                                                                                                                                                         |
| Hold inhaler upright                                                                  | Held $\leq 45^\circ$ of upright                                                                                                                              | Held $>45^\circ$ of upright                                                                                                                                                              |
| Turn clear base in direction of arrows on label until it clicks ( $\frac{1}{2}$ turn) | Rotated audible click<br>Wrong way single attempt                                                                                                            | Ignored, skipped<br>Insufficient rotation, no click heard<br>Wrong way, repeated attempts<br>Rotated $>\frac{1}{2}$ turn<br>Rotated $>1$ click audible<br>Finger on button and activates |
| Open cap                                                                              | Cap open enough to clear plume                                                                                                                               | Already opened<br>Ignored, skipped<br>Opened but plume impinged                                                                                                                          |
| Breathe out fully from mouth                                                          | Any observable exhalation (audible, visible)<br>[‘Fully’ not assessed]                                                                                       | Ignored, skipped                                                                                                                                                                         |
| Close lips around mouthpiece                                                          | Observable seal of lips to mouthpiece                                                                                                                        | Observable gap(s)<br>Other part of device in mouth<br>Vent holes obscured/covered                                                                                                        |
| Point inhaler to back of throat                                                       | Observable correct direction for $>50\%$ of inhalation                                                                                                       | Wrong direction<br>$\leq 50\%$ of inhalation                                                                                                                                             |
| Inhale slowly through mouth                                                           | Observable slow inhalation (i.e., $>2$ seconds) through mouth                                                                                                | Ignored/skipped<br>Rapid inhalation (i.e., $<2$ seconds)<br>Observable nasal inhalation                                                                                                  |

|                                                                |                                                                 |                                                                                                                                                                                                                       |
|----------------------------------------------------------------|-----------------------------------------------------------------|-----------------------------------------------------------------------------------------------------------------------------------------------------------------------------------------------------------------------|
| AND                                                            |                                                                 | Inhalation stops before press<br>No inhalation within 2 seconds of press                                                                                                                                              |
| Press down on top of inhaler (release puff)                    | Pressed sufficient to activate<br>Pressed insufficient once     | Ignored, skipped<br>Pressed insufficient repeatedly<br>Pressed in wrong place                                                                                                                                         |
| Remove mouthpiece                                              | Mouth closed                                                    | Ignored, skipped<br>Plume evident from device or mouth<br>Base turned during plume                                                                                                                                    |
| AND                                                            |                                                                 | Observable exhalation                                                                                                                                                                                                 |
| Hold breath for 10 seconds                                     | Observable breath hold >5 seconds                               | Ignored, skipped<br>Exhalation after $\leq 5$ seconds                                                                                                                                                                 |
| Breathe out                                                    | Observable breath                                               | Through device                                                                                                                                                                                                        |
| Close cap                                                      |                                                                 | Ignored, skipped                                                                                                                                                                                                      |
| Repeat 1 more times (total 2)                                  | Repeated                                                        | Ignored, skipped<br>Insufficient rotation, no click heard<br>Wrong way, repeated attempts<br>Rotated $> \frac{1}{2}$ turn<br>Rotated $> 1$ click audible<br>Finger on button and activates<br>Repeated $\geq 2$ times |
| <b>Disposal</b>                                                |                                                                 |                                                                                                                                                                                                                       |
| [When dose indicator shows $\leq 14$ , i.e. red scale portion] | Mention reorder of new device<br>Mention when probed            | Ignored/skipped<br>No mention (when probed)                                                                                                                                                                           |
| [When dose indicator shows $\leq 0$ ]                          | Rejection of device<br>Mention rejection<br>Mention when probed | Observed rotation and use<br>No mention (when probed)                                                                                                                                                                 |
| [When DISCARD BY: date exceeded]                               | Rejection of device<br>Mention rejection<br>Mention when probed | Observed rotation and use<br>No mention (when probed)                                                                                                                                                                 |
| [When EXP DATE: exceeded]                                      | Rejection of device<br>Mention rejection<br>Mention when probed | Observed rotation and use<br>No mention (when probed)                                                                                                                                                                 |

<sup>a</sup>For this study, a single spray was considered acceptable; however, the instructions for use state that user should actuate the inhaler until an aerosol cloud is visible and then repeat the process three more times.

<sup>b</sup>If not used for more than 21 days, patients are to actuate the inhaler until an aerosol cloud is visible and then repeat the process three more times to prepare the inhaler for use.

pMDI

| <b>Task step</b>                                              | <b>Acceptable</b>                                                                                | <b>Unacceptable</b>                                                                                                              |
|---------------------------------------------------------------|--------------------------------------------------------------------------------------------------|----------------------------------------------------------------------------------------------------------------------------------|
| <b>Priming</b>                                                | Attempted                                                                                        | Ignored, skipped                                                                                                                 |
| Remove cap                                                    | Cap removed                                                                                      | Ignored, skipped                                                                                                                 |
| Check inside mouthpiece                                       | Observable check                                                                                 | Ignored, skipped                                                                                                                 |
| Hold device with mouthpiece pointing away from you and others | Held in fume hood<br>Held away from face/others                                                  | At point of activation...<br>outside fume hood<br>pointed at face/others                                                         |
| Shake inhaler                                                 | Observable shake $\geq 1$ second                                                                 | Ignored, skipped<br>Shake $< 1$ second                                                                                           |
| Press down on top of inhaler (release puff)                   | Pressed sufficient to activate<br>Pressed insufficient once                                      | Ignored, skipped<br>Pressed insufficient repeatedly                                                                              |
| Repeat 3 more times (total 4)                                 | Repeated 3 times<br>Repeated 3–6 times                                                           | Ignored, skipped<br>Repeated 2–3 times<br>Repeated $\geq 6$ times                                                                |
| Replace cap                                                   | Cap replaced                                                                                     | Ignored, skipped                                                                                                                 |
| [Reprime after 7 days non-use]                                | Observable recognition of $\leq 7$ days<br>Sprayed in fume hood<br>Sprayed away from face/others | Ignored, skipped<br>No recognition of 7 days<br>Belief $> 7$ days<br>Sprayed outside fume hood<br>Sprayed pointed at face/others |
| <b>Use</b>                                                    | Attempted                                                                                        | Ignored, skipped                                                                                                                 |
| Remove cap                                                    | Cap removed                                                                                      | Ignored, skipped                                                                                                                 |
| Shake inhaler                                                 | Observable shake $\geq 1$ second                                                                 | Ignored, skipped<br>Shake $< 1$ second                                                                                           |
| Breathe out fully from mouth                                  | Any observable exhalation (audible, visible)<br>[‘Fully’ not assessed]                           | Ignored, skipped                                                                                                                 |
| Close lips around mouthpiece                                  | Observable seal of lips to mouthpiece                                                            | Observable gap(s)<br>Other part of device                                                                                        |
| Inhale slowly through mouth                                   | Observable slow inhalation (i.e., $> 2$ seconds) through mouth                                   | Ignored/skipped<br>Rapid inhalation (i.e., $< 2$ seconds)<br>Observable nasal inhalation                                         |
| AND                                                           |                                                                                                  | Inhalation stops before press<br>No inhalation within 2 seconds of press                                                         |
| Press down on top of inhaler (release puff)                   | Pressed sufficient to activate<br>Pressed insufficient once                                      | Ignored, skipped<br>Pressed insufficient repeatedly<br>Pressed in wrong place                                                    |

|                                                               |                                                                 |                                                                                                                             |
|---------------------------------------------------------------|-----------------------------------------------------------------|-----------------------------------------------------------------------------------------------------------------------------|
| Remove mouthpiece                                             | Mouth closed                                                    | Ignored, skipped<br>Plume evident from device or mouth                                                                      |
| AND                                                           |                                                                 | Observable exhalation                                                                                                       |
| Hold breath for 10 secs                                       | Observable breath hold >5 seconds                               | Ignored, skipped<br>Exhalation after $\leq 5$ seconds                                                                       |
| Breathe out                                                   | Observable breath                                               | Through device                                                                                                              |
| Repeat 1 more times (total 2)                                 | Repeated                                                        | Ignored, skipped<br>No shake<br>No exhalation<br>No seal<br>No/rapid inhalation<br>No activation<br>Repeated $\geq 2$ times |
| Replace cap                                                   | Replaced                                                        | Ignored, skipped                                                                                                            |
| <b>Dispose</b>                                                |                                                                 |                                                                                                                             |
| [When dose indicator shows $\leq 20$ i.e., red scale portion] | Mention reorder of new device<br>Mention when probed            | Ignored/skipped<br>No mention (when probed)                                                                                 |
| [When dose indicator shows $\leq 0$ ]                         | Rejection of device<br>Mention rejection<br>Mention when probed | Observed use<br>No mention (when probed)                                                                                    |
| [When EXP DATE: exceeded]                                     | Rejection of device<br>Mention rejection<br>Mention when probed | Observed use<br>No mention (when probed)                                                                                    |
